# Supplementary material for: Insight into the preferential N-binding versus O-binding of nitrosoarenes to ferrous and ferric heme centers
Source: Royal Society of Chemistry journal article supplement (doi:10.1039/d0dt03604h), 2021-01-01
Supplement: d0dt03604h2.pdf [file d0dt03604h2.pdf]

Supporting Information

**Insight Into the Preferential *N*-binding versus *O*-binding of Nitrosoarenes to Ferrous and Ferric Heme Centers**

Erwin G. Abucayon,<sup>a</sup> Jia-Min Chu,<sup>b</sup> Megan Ayala,<sup>a</sup> Rahul L. Khade,<sup>b</sup> Yong Zhang,<sup>\* b</sup> George B. Richter-Addo<sup>\* a</sup>

**Table of Contents**

- i. Protocol for liquid chromatography and mass spectrometry (LC-MS).
- ii. Figure S1. <sup>1</sup>H NMR spectrum of NODMA in CDCl<sub>3</sub>.
- iii. Figure S2. Truncated mass spectra for (*top*) unlabeled (<sup>14</sup>N-nitroso) NODMA; (*middle*) <sup>15</sup>N-nitroso NODMA; and (*bottom*) <sup>18/16</sup>O-nitroso NODMA in a 2:1 ratio.
- iv. Figure S3. <sup>1</sup>H NMR spectrum of NODEA in CDCl<sub>3</sub>.
- v. Figure S4. Truncated mass spectra for unlabeled (<sup>14</sup>NO) and labeled (<sup>15</sup>NO) NODEA.
- vi. Figure S6. Truncated FTIR spectra of crystals of the unlabeled (<sup>14</sup>N-nitroso) and labeled (<sup>15</sup>N-nitroso) (OEP)Fe(NODEA)(NH<sub>2</sub>C<sub>6</sub>H<sub>4</sub>NEt<sub>2</sub>-*p*).
- vii. Figure S7. Molecular structure of (OEP)Fe(NODEA)(NH<sub>2</sub>C<sub>6</sub>H<sub>4</sub>NEt<sub>2</sub>-*p*) showing the disordered fragments.
- viii. Figure S8. Truncated FTIR spectra (KBr pellets) of crystals of the unlabeled (<sup>14</sup>N-nitroso) and labeled (<sup>15</sup>N-nitroso) [(OEP)Fe(NODEA)]SbF<sub>6</sub> adducts obtained from the reactions of (OEP)Fe(FSbF<sub>5</sub>) with unlabeled and <sup>15</sup>N-nitroso labeled NODEA.
- ix. Figure S9. Truncated FTIR spectra (KBr pellets) of crystals of the unlabeled (<sup>14</sup>N-nitroso) and labeled (<sup>15</sup>N-nitroso) [(TTP)Fe(NODMA)]SbF<sub>6</sub> adducts obtained from the reactions of (TTP)Fe(FSbF<sub>5</sub>) with unlabeled and <sup>15</sup>N-nitroso labeled NODMA.
- x. Figure S10. Truncated FTIR spectra (KBr pellets) of crystals of the unlabeled (<sup>14</sup>N-nitroso) and labeled (<sup>15</sup>N-nitroso and <sup>18</sup>O-nitroso) product prepared from the in situ reduction of (OEP)FeCl by Zn/Hg followed by reaction with excess NODMA.
- xi. Table S1. Crystal Data and Structural Refinement
- xii. Cartesian coordinates of DFT-optimized iron porphyrins with favorable spin states

*Protocol for Liquid Chromatography and Mass Spectrometry.* Sample introduction was performed using a Waters (Milford, MA) Acquity Ultra High-Pressure Liquid Chromatography (UPLC) M-Class system. Optimum LCMS Grade Methanol (Fisher Scientific, Pittsburg, PA) was used as mobile phase carrier at 20 μL/min for injection of 2 μL sample. The UPLC eluent was introduced into a Waters G2-Si Ion Mobility Q-TOF Mass Spectrometer equipped with an electrospray ionization source operated in positive ion mode. Nitrogen gas was used as a nebulizing and drying gas with a drying gas temperature of 325°C at 10 L/min flow rate. Capillary voltage was set at 3.2kV. Data was collected and analyzed with Mass Lynx Software (V4.1, 2015).

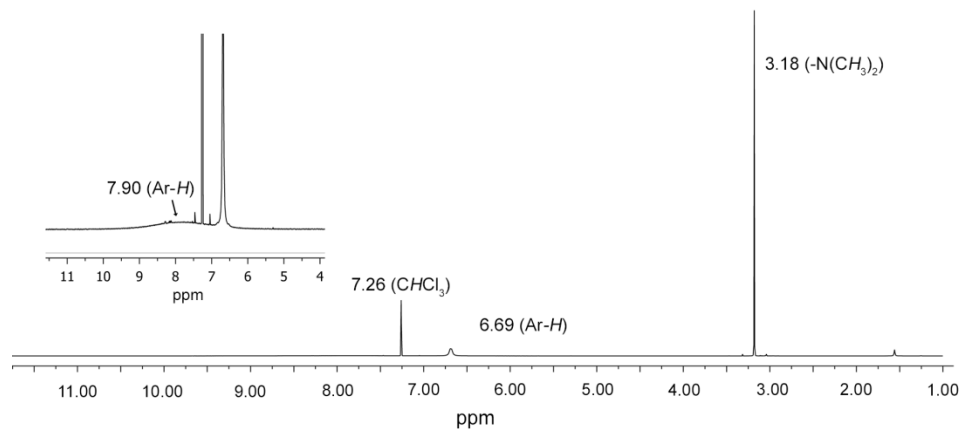

**Figure S1.**  $^1\text{H}$  NMR spectrum of NODMA in  $\text{CDCl}_3$  at  $25\text{ }^\circ\text{C}$ . Inset is the zoomed-in aromatic region showing a broad peak assigned to *ortho*-Ar-H to the NO group. The spectrum is the same as that reported for the  $^{15}\text{N}$ -labeled analog<sup>1-3</sup>

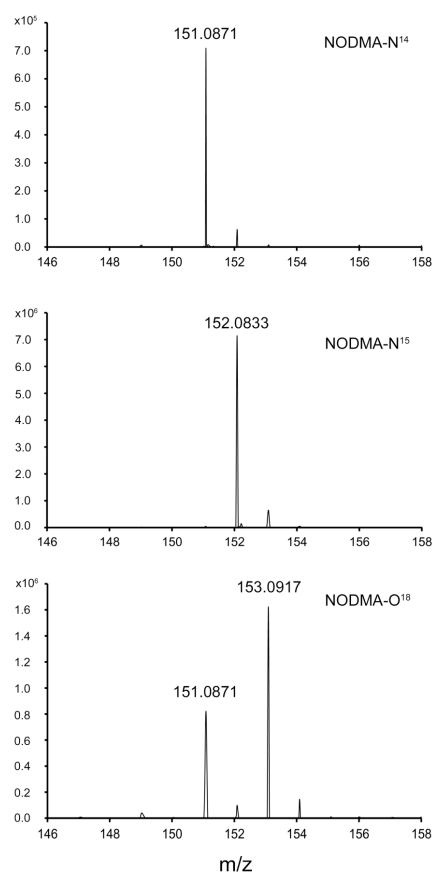

**Figure S2.** Truncated mass spectra for (*top*) unlabeled ( $^{14}\text{N}$ -nitroso) NODMA; (*middle*)  $^{15}\text{N}$ -nitroso NODMA; and (*bottom*)  $^{18}/^{16}\text{O}$ -nitroso NODMA in a 2:1 ratio, showing their respective molecular ion peaks (positive ion mode).

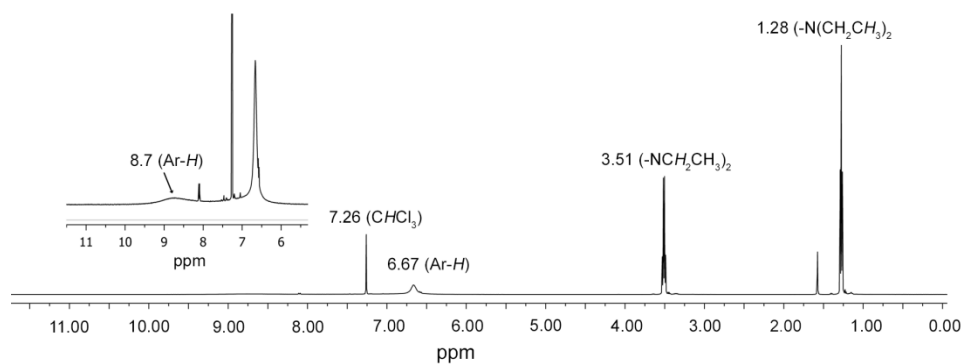

**Figure S3.**  $^1\text{H}$  NMR spectrum of NODEA in  $\text{CDCl}_3$  at 25 °C. Inset is the zoomed-in aromatic region showing a broad peak assigned to *ortho*-Ar-H to the NO group. The spectrum is the same as that reported for the labeled analog.<sup>1,3</sup>

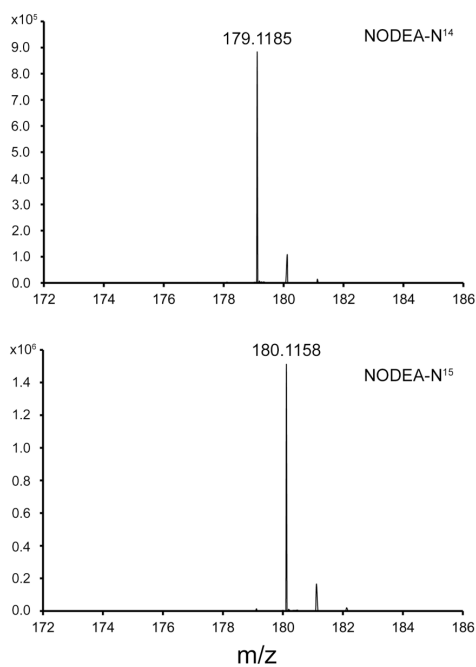

**Figure S4.** Truncated mass spectra for (*top*) unlabeled ( $^{14}\text{N}$ -nitroso) NODEA; and (*bottom*)  $^{15}\text{N}$ -nitroso NODEA, showing their respective molecular ion peaks (positive ion mode).

**Figure S5.** See separate movie file

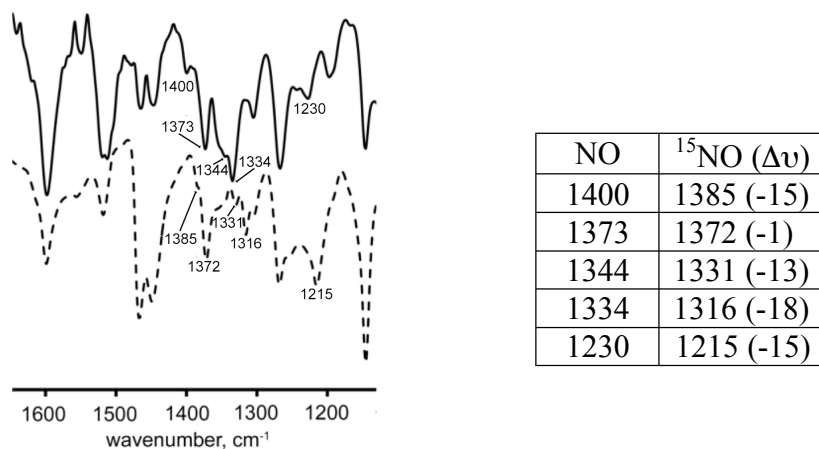

**Figure S6.** Truncated FTIR spectra of crystals of the unlabeled (<sup>14</sup>N-nitroso; solid line trace) and labeled (<sup>15</sup>N-nitroso; broken line trace) (OEP)Fe(NODEA)(NH<sub>2</sub>C<sub>6</sub>H<sub>4</sub>NEt<sub>2</sub>-*p*) as KBr pellets, highlighting bands that shift with <sup>15</sup>N-nitroso substitution.

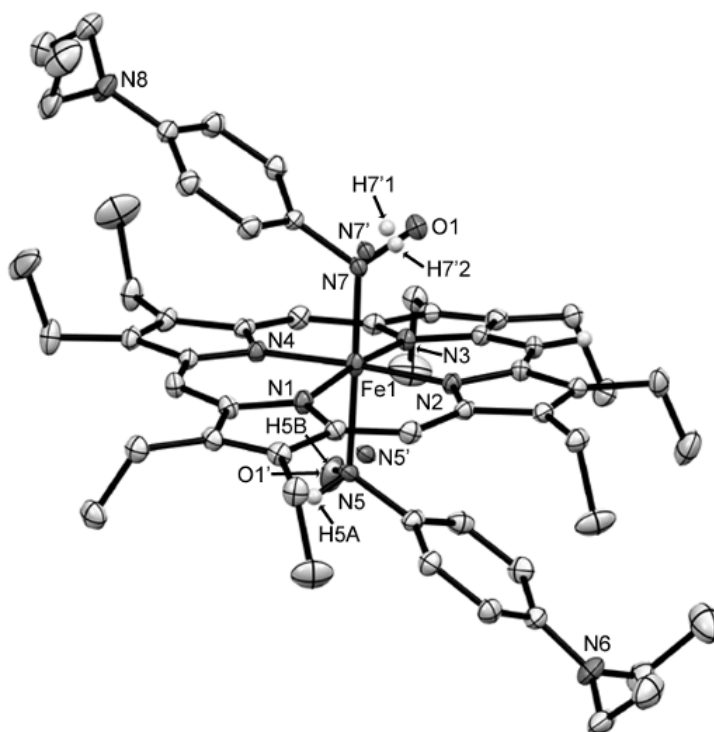

**Figure S7.** Molecular structure of (OEP)Fe(NODEA)(NH<sub>2</sub>C<sub>6</sub>H<sub>4</sub>NEt<sub>2</sub>-*p*) showing the disordered fragments, with thermal ellipsoids drawn at 35% probability. Hydrogen atoms except for those of the NH<sub>2</sub> moieties have been omitted for clarity.

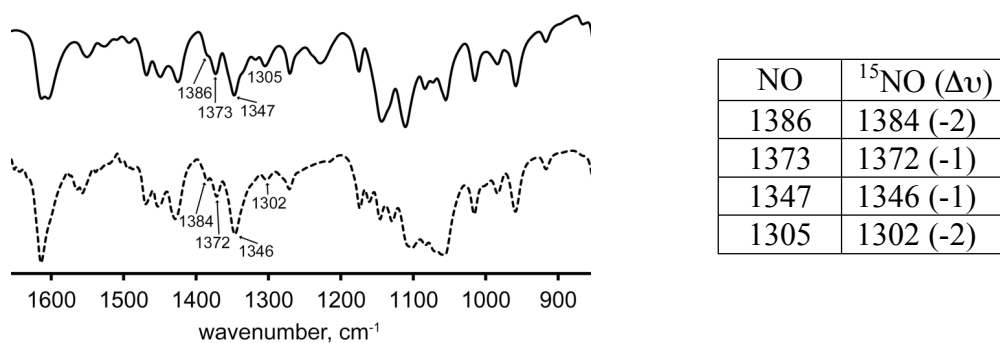

**Figure S8.** Truncated FTIR spectra (KBr pellets) of crystals of the unlabeled (<sup>14</sup>N-nitroso; solid line trace) and labeled (<sup>15</sup>N-nitroso; broken line trace) [(OEP)Fe(NODEA)]SbF<sub>6</sub> adducts obtained from the reactions of (OEP)Fe(FSbF<sub>5</sub>) with unlabeled and <sup>15</sup>N-nitroso labeled NODEA, respectively, highlighting bands that shift with <sup>15</sup>N-nitroso substitution.

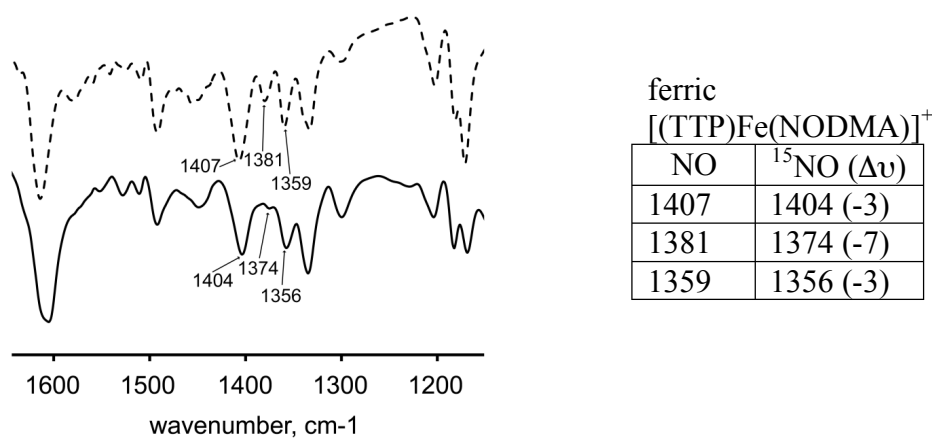

**Figure S9.** Truncated FTIR spectra (KBr pellets) of crystals of the unlabeled (<sup>14</sup>N-nitroso; solid line trace) and labeled (<sup>15</sup>N-nitroso; broken line trace) [(TTP)Fe(NODMA)]SbF<sub>6</sub> adducts obtained from the reactions of (TTP)Fe(FSbF<sub>5</sub>) with unlabeled and <sup>15</sup>N-nitroso labeled NODMA, respectively, highlighting bands that shift with <sup>15</sup>N-nitroso substitution.

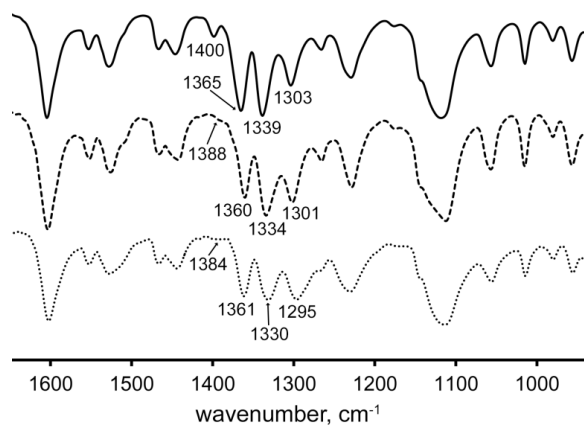

| NO   | <sup>15</sup> NNO ( $\Delta\nu$ ) | N <sup>18</sup> O ( $\Delta\nu$ ) |
|------|-----------------------------------|-----------------------------------|
| 1400 | 1388 (-12)                        | 1384 (-16)                        |
| 1365 | 1360 (-5)                         | 1361 (-4)                         |
| 1339 | 1334 (-5)                         | 1330 (-9)                         |
| 1303 | 1301 (-2)                         | 1295 (-8)                         |

**Figure S10.** Truncated FTIR spectra (KBr pellets) of crystals of the unlabeled (<sup>14</sup>N-nitroso; solid line trace) and labeled (<sup>15</sup>N-nitroso = broken line trace, and <sup>18</sup>O-nitroso = dotted line trace) product prepared from the in situ reduction of (OEP)FeCl by Zn/Hg followed by reaction with excess NODMA, highlighting bands that shift with <sup>15</sup>N- and <sup>18</sup>O-nitroso substitution.

Table S1. Crystal Data and Structural Refinement

| Compound                                       | (OEP)Fe(NODEA)(NH <sub>2</sub> C <sub>6</sub> H <sub>4</sub> NEt <sub>2</sub> -p) <sup>a</sup> | [(OEP)Fe(NODEA)]SbF <sub>6</sub> •(CH <sub>2</sub> Cl <sub>2</sub> ) <sup>b</sup>   | [(TTP)Fe(NODMA)]SbF <sub>6</sub> <sup>b</sup>                                     |
|------------------------------------------------|------------------------------------------------------------------------------------------------|-------------------------------------------------------------------------------------|-----------------------------------------------------------------------------------|
| CCDC                                           | 2011046                                                                                        | 2011047                                                                             | 2011048                                                                           |
| Empirical Formula                              | C <sub>56</sub> H <sub>74</sub> FeN <sub>8</sub> O                                             | C <sub>47</sub> H <sub>60</sub> FeN <sub>6</sub> OCl <sub>2</sub> F <sub>6</sub> Sb | C <sub>56</sub> H <sub>46</sub> FeN <sub>6</sub> O <sub>1</sub> F <sub>6</sub> Sb |
| Formula weight                                 | 931.08                                                                                         | 1087.51                                                                             | 1110.59 (1181.485) <sup>c</sup>                                                   |
| Crystal system                                 | Monoclinic                                                                                     | Triclinic                                                                           | Monoclinic                                                                        |
| Space group                                    | P2 <sub>1</sub> /n                                                                             | P $\bar{1}$                                                                         | P2 <sub>1</sub> /c                                                                |
| <i>a</i> (Å), $\alpha$ (°)                     | 14.1052(13), 90                                                                                | 13.2553(8), 79.6981(10)                                                             | 21.4336(11), 90                                                                   |
| <i>b</i> (Å), $\beta$ (°)                      | 14.6434(15), 105.549(3)                                                                        | 13.6557(8), 77.0265(10)                                                             | 15.7973(8), 97.599(2)                                                             |
| <i>c</i> (Å), $\gamma$ (°)                     | 24.980(2), 90                                                                                  | 15.0672(9), 64.4348(9)                                                              | 16.4555(8), 90                                                                    |
| <i>V</i> , <i>Z</i> / <i>Z'</i>                | 4970.7(8) Å <sup>3</sup> , 4                                                                   | 2387.1(2) Å <sup>3</sup> , 2                                                        | 5522.8(5) Å <sup>3</sup> , 4                                                      |
| <i>D</i> (calcd), g/cm <sup>3</sup>            | 1.244                                                                                          | 1.513                                                                               | 1.336 (1.421) <sup>c</sup>                                                        |
| Abs coeff, mm <sup>-1</sup>                    | 0.352                                                                                          | 1.048                                                                               | 0.814 (0.91) <sup>c</sup>                                                         |
| <i>F</i> (000)                                 | 2000                                                                                           | 1114                                                                                | 2252                                                                              |
| Crystal size (mm)                              | 0.040 x 0.156 x 0.173                                                                          | 0.080 x 0.240 x 0.420                                                               | 0.024 x 0.132 x 0.233                                                             |
| $\theta$ range for data collection             | 2.191–27.366°                                                                                  | 1.393–29.784°                                                                       | 2.310–25.383°                                                                     |
| Reflections collected                          | 72590                                                                                          | 55564                                                                               | 80385                                                                             |
| Independent reflns                             | 11216 [R <sub>int</sub> = 0.0828]                                                              | 13621 [R <sub>int</sub> = 0.0400]                                                   | 10138 [R <sub>int</sub> = 0.0842]                                                 |
| Data / restraints / parameters                 | 11216 / 51 / 611                                                                               | 13621 / 624 / 654                                                                   | 10138 / 1157 / 708                                                                |
| Goodness-of-fit on <i>F</i> <sup>2</sup>       | 1.027                                                                                          | 1.005                                                                               | 1.053                                                                             |
| Final R indices [I > 2σ(I)]                    | R1 = 0.0468                                                                                    | R1 = 0.0417                                                                         | R1 = 0.0636                                                                       |
| R indices (all data)                           | wR2 = 0.1064                                                                                   | wR2 = 0.1056                                                                        | wR2 = 0.1637                                                                      |
| Largest diff. peak and hole, e.Å <sup>-3</sup> | 0.419 and -0.732                                                                               | 1.495 and -0.573                                                                    | 0.573 d -0.965                                                                    |

<sup>a</sup> Using a D8 Quest  $\kappa$ -geometry diffractometer with a Bruker Photon II cmos area detector and an Incoatec I $\mu$ s microfocus Mo K $\alpha$  source.

<sup>b</sup> Using a diffractometer with a Bruker APEX ccd area detector and graphite-monochromated Mo K $\alpha$  radiation.

<sup>c</sup> Data in brackets represent corresponding values when the squeezed solvent is included.

## Cartesian coordinates of DFT-optimized iron porphyrins with favorable spin states

### (i) Fe<sup>II</sup>-N (bis NODMA) S=0

|    |             |            |             |
|----|-------------|------------|-------------|
| Fe | 3.41371700  | 3.43764000 | 5.27106300  |
| O  | 4.67688700  | 5.61569800 | 3.98042700  |
| N  | 1.64173100  | 4.10455300 | 5.97380000  |
| N  | 2.75701200  | 3.64969800 | 3.37451900  |
| N  | 4.30801300  | 5.25261300 | 5.07353200  |
| N  | 6.49356100  | 8.12552800 | 9.35725700  |
| C  | 1.24786800  | 4.16128100 | 7.27716200  |
| C  | -0.12805600 | 4.59229900 | 7.36308300  |
| H  | -0.67758500 | 4.72706200 | 8.28622400  |
| C  | -0.55909300 | 4.77027300 | 6.08998500  |
| H  | -1.53724300 | 5.08184300 | 5.74599700  |
| C  | 0.55384800  | 4.44388100 | 5.22860200  |
| C  | 0.49152400  | 4.43123000 | 3.84214100  |
| C  | 1.52224500  | 4.06518400 | 2.98783100  |
| C  | 1.43702200  | 4.11340700 | 1.54532300  |
| H  | 0.55856700  | 4.41037100 | 0.98649800  |
| C  | 2.65271200  | 3.74287000 | 1.07613300  |
| H  | 2.98548400  | 3.66760300 | 0.04856400  |
| C  | 3.47137300  | 3.46067200 | 2.23215800  |
| C  | 4.79675800  | 3.05661600 | 2.17125700  |
| C  | 4.85194000  | 6.00460900 | 6.15007700  |
| C  | 4.08783600  | 6.24836500 | 7.28873200  |
| H  | 3.06474000  | 5.89833000 | 7.33077900  |
| C  | 4.61891800  | 6.97130900 | 8.33826300  |
| H  | 3.99280700  | 7.15972800 | 9.20121400  |
| C  | 5.95291400  | 7.43877300 | 8.29808700  |
| C  | 6.71270100  | 7.17386900 | 7.13336000  |
| H  | 7.74509700  | 7.49340700 | 7.06468700  |
| C  | 6.16088200  | 6.48587600 | 6.07110300  |
| H  | 6.75083600  | 6.26938800 | 5.18669600  |
| C  | 5.75464700  | 8.22645500 | 10.59922900 |
| C  | 7.88194500  | 8.53458100 | 9.32005600  |
| N  | 5.19571000  | 2.78784200 | 4.56866900  |
| N  | 4.06956000  | 3.21578700 | 7.16867100  |
| C  | 5.59583200  | 2.75222600 | 3.26618600  |
| C  | 6.97830100  | 2.34414000 | 3.18143900  |
| H  | 7.53400700  | 2.22912200 | 2.25931000  |
| C  | 7.40575000  | 2.15400600 | 4.45444500  |
| H  | 8.38652600  | 1.85099100 | 4.79865600  |
| C  | 6.28469700  | 2.45227200 | 5.31477000  |
| C  | 6.33847500  | 2.44237500 | 6.70154000  |
| C  | 5.30205400  | 2.79265700 | 7.55545300  |



|   |             |             |             |
|---|-------------|-------------|-------------|
| C | 5.38345100  | 2.73335200  | 8.99752100  |
| H | 6.25906500  | 2.42778400  | 9.55619900  |
| C | 4.16940100  | 3.10968400  | 9.46674500  |
| H | 3.83552900  | 3.18241000  | 10.49415900 |
| C | 3.35565900  | 3.40594600  | 8.31107700  |
| C | 2.04001100  | 3.84107500  | 8.37217300  |
| O | 2.09080400  | 1.29702700  | 6.54258700  |
| N | 2.52254600  | 1.62283600  | 5.46029600  |
| N | 0.69553000  | -1.51931500 | 1.19729400  |
| C | 2.06688900  | 0.81245700  | 4.38569400  |
| C | 2.89527900  | 0.56798900  | 3.29280600  |
| H | 3.89933800  | 0.97025900  | 3.28422900  |
| C | 2.45397500  | -0.22196000 | 2.24985100  |
| H | 3.12939700  | -0.40869400 | 1.42444300  |
| C | 1.14712200  | -0.76175400 | 2.24888500  |
| C | 0.31895800  | -0.49342400 | 3.36585400  |
| H | -0.69682400 | -0.86719300 | 3.40053200  |
| C | 0.78183500  | 0.26385200  | 4.42261100  |
| H | 0.14008700  | 0.47885000  | 5.27037200  |
| C | 1.50570700  | -1.64722900 | 0.00332100  |
| H | 2.45056500  | -2.16455700 | 0.21253400  |
| H | 0.96267300  | -2.23438000 | -0.73849100 |
| H | 1.73883000  | -0.66873800 | -0.43873500 |
| C | -0.66524500 | -2.01413800 | 1.19312300  |
| H | -1.40348100 | -1.19936200 | 1.18920300  |
| H | -0.82413300 | -2.62085100 | 0.30054500  |
| H | -0.85865600 | -2.64994600 | 2.06553000  |
| H | -0.44670100 | 4.73436700  | 3.38607200  |
| H | 5.24805300  | 2.97064100  | 1.18689700  |
| H | 7.27634800  | 2.13916000  | 7.15827800  |
| H | 4.82720900  | 8.79813500  | 10.46900400 |
| H | 5.49646200  | 7.23763600  | 11.00306400 |
| H | 6.36419900  | 8.74753300  | 11.33877800 |
| H | 8.07786700  | 9.19196600  | 8.46456600  |
| H | 8.11567400  | 9.09487500  | 10.22646300 |
| H | 8.56756300  | 7.67683200  | 9.26059700  |
| H | 1.59064900  | 3.93741300  | 9.35646400  |

**(ii) Fe<sup>II</sup>-O (bis NODMA)  $S = 0$**

|    |            |            |            |
|----|------------|------------|------------|
| Fe | 3.94447600 | 5.24617900 | 4.93258200 |
| O  | 5.54356200 | 5.20137600 | 6.10572100 |
| N  | 3.00283300 | 6.52092700 | 6.18079700 |
| N  | 3.20624600 | 3.68192600 | 5.97079600 |
| N  | 4.88618800 | 3.97144500 | 3.68441300 |

|   |             |             |             |
|---|-------------|-------------|-------------|
| N | 4.68271000  | 6.81044500  | 3.89438600  |
| N | 5.98203700  | 6.24458300  | 6.57497600  |
| N | 10.43016500 | 5.93824600  | 9.91144000  |
| C | 3.02941600  | 7.88005800  | 6.13210700  |
| C | 2.24108700  | 8.43656700  | 7.20786700  |
| H | 2.10033200  | 9.49482200  | 7.38991400  |
| C | 1.74126400  | 7.38566700  | 7.90325600  |
| H | 1.10335300  | 7.39658100  | 8.77826600  |
| C | 2.22709700  | 6.19212800  | 7.24909100  |
| C | 1.93709800  | 4.90022500  | 7.66482500  |
| C | 2.39526700  | 3.73730200  | 7.06185400  |
| C | 2.06855600  | 2.40362300  | 7.51279200  |
| H | 1.43836600  | 2.17397100  | 8.36297500  |
| C | 2.69794000  | 1.54746800  | 6.67096800  |
| H | 2.69520400  | 0.46455500  | 6.68316400  |
| C | 3.40646200  | 2.36189100  | 5.71022700  |
| C | 4.17627600  | 1.85480100  | 4.67336000  |
| C | 4.85974800  | 2.61231500  | 3.73321700  |
| C | 5.64798700  | 2.05580000  | 2.65739400  |
| H | 5.78884900  | 0.99754400  | 2.47543000  |
| C | 6.14754100  | 3.10669300  | 1.96180300  |
| H | 6.78531400  | 3.09577500  | 1.08669100  |
| C | 5.66170800  | 4.30023600  | 2.61596000  |
| C | 5.95158900  | 5.59213900  | 2.20014900  |
| C | 5.49356300  | 6.75506000  | 2.80323600  |
| C | 5.82041000  | 8.08873600  | 2.35238800  |
| H | 6.45052000  | 8.31838200  | 1.50214300  |
| C | 5.19131700  | 8.94490000  | 3.19442000  |
| H | 5.19423100  | 10.02781400 | 3.18234400  |
| C | 4.48274000  | 8.13048600  | 4.15512700  |
| C | 3.71303500  | 8.63757700  | 5.19207200  |
| C | 7.09812000  | 6.08691800  | 7.39579500  |
| C | 7.61651200  | 7.26334600  | 7.94863500  |
| H | 7.12974700  | 8.20350500  | 7.70683800  |
| C | 8.71698200  | 7.22542400  | 8.78000600  |
| H | 9.09538700  | 8.15183400  | 9.19305800  |
| C | 9.34052500  | 5.99156200  | 9.08755600  |
| C | 8.80178200  | 4.80581800  | 8.51593400  |
| H | 9.25318900  | 3.84465800  | 8.72841100  |
| C | 7.70450800  | 4.85356100  | 7.68877300  |
| H | 7.29384000  | 3.94800100  | 7.25460100  |
| C | 10.96373300 | 7.15614800  | 10.48911600 |
| H | 11.82153400 | 6.91106100  | 11.11609600 |
| H | 10.22012800 | 7.66438000  | 11.11639200 |
| H | 11.30015200 | 7.85685500  | 9.71413600  |
| C | 11.05592300 | 4.66593000  | 10.21631000 |

|   |             |            |             |
|---|-------------|------------|-------------|
| H | 11.43344300 | 4.17387500 | 9.31097400  |
| H | 10.35913900 | 3.98240200 | 10.71798400 |
| H | 11.90131900 | 4.83335900 | 10.88438000 |
| H | 6.59159900  | 5.70244100 | 1.32900700  |
| H | 4.24675200  | 0.77368700 | 4.58824800  |
| H | 1.29694600  | 4.78993500 | 8.53586400  |
| H | 3.64271700  | 9.71869200 | 5.27730300  |
| O | 2.34543700  | 5.29094100 | 3.75954000  |
| N | 1.90704100  | 4.24776500 | 3.29013800  |
| C | 0.79090000  | 4.40548500 | 2.46939800  |
| C | 0.27252100  | 3.22909700 | 1.91647300  |
| C | 0.18440600  | 5.63884000 | 2.17664900  |
| H | 0.75935300  | 2.28893600 | 2.15812500  |
| C | -0.82804300 | 3.26705500 | 1.08522200  |
| C | -0.91294000 | 5.68662300 | 1.34958600  |
| H | 0.59498900  | 6.54435600 | 2.61099400  |
| H | -1.20644300 | 2.34066500 | 0.67213200  |
| C | -1.45160400 | 4.50093300 | 0.77776300  |
| H | -1.36454600 | 6.64776000 | 1.13744200  |
| N | -2.54120400 | 4.55432200 | -0.04619500 |
| C | -3.07645400 | 3.33617300 | -0.62178100 |
| C | -3.16770200 | 5.82650800 | -0.35004400 |
| H | -3.93460400 | 3.58127000 | -1.24828300 |
| H | -3.41269900 | 2.63666500 | 0.15437200  |
| H | -2.33390700 | 2.82657100 | -1.24918400 |
| H | -2.47081400 | 6.51112300 | -0.85002100 |
| H | -3.54673600 | 6.31721700 | 0.55542700  |
| H | -4.01202700 | 5.65927200 | -1.01952000 |

**(iii) Fe<sup>III</sup>-O (mono NODMA)  $S = 3/2$**

|    |             |            |             |
|----|-------------|------------|-------------|
| Fe | 3.90795600  | 5.33070000 | 4.94146300  |
| O  | 5.57465900  | 5.08919500 | 6.15002500  |
| N  | 2.83853900  | 6.40499300 | 6.22665400  |
| N  | 2.99395900  | 3.68569900 | 5.58733700  |
| N  | 4.65382200  | 4.28992200 | 3.41907900  |
| N  | 4.49644200  | 7.00964400 | 4.05597800  |
| N  | 5.95263900  | 6.14027300 | 6.72436800  |
| N  | 10.33336300 | 6.00541500 | 10.05673000 |
| C  | 2.85909600  | 7.76859500 | 6.38742400  |
| C  | 2.07184600  | 8.15427800 | 7.52017200  |
| H  | 1.92308500  | 9.17530200 | 7.84529400  |
| C  | 1.57468800  | 7.01288400 | 8.05867100  |
| H  | 0.93077500  | 6.89636500 | 8.92009000  |
| C  | 2.05542600  | 5.93163900 | 7.25146000  |
| C  | 1.75113600  | 4.60774200 | 7.48485900  |

|   |             |             |             |
|---|-------------|-------------|-------------|
| C | 2.18638000  | 3.56708400  | 6.69274500  |
| C | 1.83643000  | 2.19635300  | 6.91649100  |
| H | 1.20266200  | 1.84825900  | 7.72107500  |
| C | 2.43730300  | 1.47402400  | 5.93816300  |
| H | 2.40281700  | 0.40620300  | 5.76852700  |
| C | 3.15725400  | 2.40375800  | 5.12045600  |
| C | 3.90756700  | 2.03783600  | 4.02376700  |
| C | 4.60180100  | 2.92932500  | 3.23450200  |
| C | 5.38027900  | 2.54504400  | 2.09542000  |
| H | 5.48833900  | 1.52888900  | 1.74051400  |
| C | 5.91712500  | 3.68195400  | 1.58629200  |
| H | 6.55946200  | 3.79850300  | 0.72372000  |
| C | 5.46225200  | 4.75998400  | 2.41226400  |
| C | 5.79369100  | 6.08075600  | 2.19866800  |
| C | 5.32812000  | 7.12496900  | 2.96846000  |
| C | 5.64954200  | 8.49925000  | 2.72384000  |
| H | 6.28044500  | 8.84760800  | 1.91710500  |
| C | 5.00867100  | 9.22591800  | 3.67316000  |
| H | 5.00115200  | 10.29874100 | 3.81207500  |
| C | 4.30032000  | 8.29443400  | 4.49916700  |
| C | 3.53881200  | 8.66168900  | 5.58759800  |
| C | 7.03219700  | 6.02458100  | 7.52286900  |
| C | 7.45185600  | 7.21675000  | 8.16635300  |
| H | 6.88786200  | 8.12477800  | 7.97671200  |
| C | 8.53449000  | 7.22146200  | 9.00002600  |
| H | 8.83187400  | 8.14585800  | 9.47678600  |
| C | 9.26665800  | 6.01688300  | 9.23912200  |
| C | 8.83351300  | 4.81476800  | 8.58252100  |
| H | 9.36811800  | 3.88797200  | 8.74491800  |
| C | 7.75279800  | 4.81900700  | 7.75256400  |
| H | 7.42858400  | 3.90960000  | 7.25890000  |
| C | 10.76787800 | 7.22942900  | 10.72319700 |
| H | 11.63794700 | 7.01068900  | 11.34006800 |
| H | 9.97966600  | 7.62431300  | 11.37278500 |
| H | 11.05037600 | 7.99559600  | 9.99352800  |
| C | 11.07872400 | 4.77258700  | 10.29551200 |
| H | 11.50101500 | 4.38061800  | 9.36442200  |
| H | 10.44127100 | 4.00846700  | 10.75244100 |
| H | 11.90071900 | 4.98039000  | 10.97857400 |
| H | 3.46544900  | 9.71730100  | 5.82552300  |
| H | 1.11587000  | 4.37238600  | 8.33168700  |
| H | 3.95087300  | 0.98586100  | 3.76381000  |
| H | 6.44485400  | 6.31405500  | 1.36342200  |

**(iv) Fe<sup>III</sup>-O (mono NODMA)  $S = 5/2$** 

|    |             |             |             |
|----|-------------|-------------|-------------|
| Fe | 4.08298100  | 5.24795500  | 5.05335900  |
| O  | 5.76348300  | 5.01456000  | 6.26854000  |
| N  | 2.82883100  | 6.39043700  | 6.29685600  |
| N  | 2.90403000  | 3.57572000  | 5.55635100  |
| N  | 4.62930400  | 4.20570000  | 3.30641300  |
| N  | 4.55717200  | 7.02490500  | 4.03597600  |
| N  | 6.10566700  | 6.08290900  | 6.83130100  |
| N  | 10.47838200 | 6.11529100  | 10.19121500 |
| C  | 2.88362400  | 7.76049600  | 6.43980400  |
| C  | 2.04286600  | 8.15590300  | 7.56117900  |
| H  | 1.89165900  | 9.17278300  | 7.89891500  |
| C  | 1.49489900  | 7.02102100  | 8.05452100  |
| H  | 0.80435800  | 6.91586800  | 8.88089100  |
| C  | 2.00382300  | 5.92858700  | 7.23923200  |
| C  | 1.65010200  | 4.55887100  | 7.41159100  |
| C  | 2.04898500  | 3.49819100  | 6.63623400  |
| C  | 1.61042500  | 2.11927600  | 6.79881400  |
| H  | 0.93131300  | 1.76779700  | 7.56440500  |
| C  | 2.19762700  | 1.40595900  | 5.81012600  |
| H  | 2.10023000  | 0.34919400  | 5.59919700  |
| C  | 3.00111000  | 2.34537400  | 5.04389000  |
| C  | 3.76474100  | 1.99828800  | 3.89230700  |
| C  | 4.49067700  | 2.84993400  | 3.09700100  |
| C  | 5.20402500  | 2.47861800  | 1.88345900  |
| H  | 5.26081900  | 1.47818800  | 1.47512700  |
| C  | 5.74171800  | 3.61677600  | 1.38655200  |
| H  | 6.33169600  | 3.74090100  | 0.48807400  |
| C  | 5.36226000  | 4.68586100  | 2.29699200  |
| C  | 5.71108800  | 6.05577000  | 2.11544100  |
| C  | 5.33120100  | 7.11714600  | 2.89930400  |
| C  | 5.64674100  | 8.51665000  | 2.64986600  |
| H  | 6.23564600  | 8.88477400  | 1.82009300  |
| C  | 5.04698500  | 9.22954500  | 3.63165400  |
| H  | 5.04453500  | 10.30242800 | 3.77234100  |
| C  | 4.36783000  | 8.26753500  | 4.48614300  |
| C  | 3.59168000  | 8.61369900  | 5.63025200  |
| C  | 7.18780600  | 6.00965900  | 7.64142500  |
| C  | 7.56867100  | 7.21838200  | 8.27246900  |
| H  | 6.98032000  | 8.10835800  | 8.07112700  |
| C  | 8.64773500  | 7.26425100  | 9.11233100  |
| H  | 8.91500400  | 8.20249600  | 9.57995900  |
| C  | 9.41317000  | 6.08600400  | 9.36815100  |
| C  | 9.01780900  | 4.86619600  | 8.72435400  |
| H  | 9.57707300  | 3.95635400  | 8.89942100  |

|   |             |            |             |
|---|-------------|------------|-------------|
| C | 7.94032100  | 4.83030300 | 7.88842300  |
| H | 7.64454700  | 3.90663100 | 7.40349200  |
| C | 10.87267600 | 7.35860600 | 10.84443600 |
| H | 11.74791800 | 7.17420900 | 11.46546200 |
| H | 10.07148300 | 7.73696900 | 11.48838900 |
| H | 11.13293700 | 8.12605700 | 10.10748100 |
| C | 11.25731000 | 4.90794600 | 10.44610500 |
| H | 11.69254100 | 4.51579200 | 9.52080500  |
| H | 10.64166100 | 4.13069900 | 10.91132000 |
| H | 12.07209500 | 5.14710300 | 11.12778100 |
| H | 3.53184500  | 9.67331600 | 5.86212100  |
| H | 0.96634500  | 4.34125700 | 8.22702700  |
| H | 3.74096000  | 0.95222300 | 3.60087100  |
| H | 6.31771000  | 6.28085900 | 1.24298400  |

**(v) Fe<sup>III</sup>-N (mono NODMA)  $S = 3/2$**

|    |             |            |            |
|----|-------------|------------|------------|
| Fe | 3.57032000  | 3.46746200 | 5.19445500 |
| N  | 2.13142200  | 4.50776700 | 6.13504200 |
| N  | 2.98905600  | 4.26513700 | 3.45007700 |
| C  | 1.90279100  | 4.54504700 | 7.49858000 |
| C  | 0.71349900  | 5.33645600 | 7.77797000 |
| H  | 0.31946200  | 5.52836700 | 8.76690700 |
| C  | 0.23480300  | 5.74419000 | 6.58648500 |
| H  | -0.63775900 | 6.34843100 | 6.37804700 |
| C  | 1.14016000  | 5.21552300 | 5.57905900 |
| C  | 0.98353200  | 5.44695900 | 4.19397400 |
| C  | 1.85211300  | 5.02450900 | 3.23107300 |
| C  | 1.74653900  | 5.36041000 | 1.82073800 |
| H  | 0.94751200  | 5.94493200 | 1.38482000 |
| C  | 2.82874200  | 4.82989900 | 1.21735600 |
| H  | 3.11323900  | 4.88011500 | 0.17481000 |
| C  | 3.58808000  | 4.14889900 | 2.25272000 |
| C  | 4.77827600  | 3.43864500 | 2.00346000 |
| N  | 5.15295200  | 2.63885800 | 4.28022000 |
| N  | 4.28247000  | 2.84680100 | 6.96509200 |
| C  | 5.48426200  | 2.74100500 | 2.94680900 |
| C  | 6.68191000  | 1.96172800 | 2.67198600 |
| H  | 7.15588000  | 1.88058400 | 1.70283500 |
| C  | 7.04855800  | 1.39411000 | 3.83920800 |
| H  | 7.89089700  | 0.74623600 | 4.04088100 |
| C  | 6.08812100  | 1.83875000 | 4.83185600 |
| C  | 6.16296800  | 1.49322700 | 6.19373300 |
| C  | 5.33730100  | 1.97934100 | 7.16916100 |
| C  | 5.46339300  | 1.67536800 | 8.58616500 |
| H  | 6.21094500  | 1.02019000 | 9.01267500 |

|   |             |             |             |
|---|-------------|-------------|-------------|
| C | 4.49384200  | 2.37044700  | 9.21279000  |
| H | 4.26570300  | 2.41062200  | 10.26936000 |
| C | 3.76605200  | 3.08710800  | 8.17815900  |
| C | 2.64867700  | 3.90942900  | 8.44510800  |
| O | 1.58096500  | 1.48801800  | 6.37283000  |
| N | 2.10400100  | 1.59425100  | 5.27527400  |
| N | 0.81125800  | -2.04617600 | 1.27319000  |
| C | 1.74777300  | 0.66164200  | 4.30797500  |
| C | 2.36218400  | 0.76457700  | 3.05004500  |
| H | 3.08525500  | 1.55334600  | 2.87967000  |
| C | 2.06203000  | -0.12260200 | 2.04295400  |
| H | 2.55589900  | -0.01643800 | 1.08573300  |
| C | 1.11871300  | -1.16480800 | 2.25611000  |
| C | 0.50312900  | -1.25597900 | 3.54053800  |
| H | -0.22032300 | -2.03568900 | 3.74185900  |
| C | 0.81150300  | -0.36679300 | 4.53723300  |
| H | 0.33962200  | -0.44263600 | 5.51070000  |
| C | 1.44624900  | -1.93934800 | -0.03061700 |
| H | 2.53419700  | -2.05390400 | 0.04466200  |
| H | 1.06862600  | -2.72869200 | -0.67961400 |
| H | 1.22396500  | -0.97586100 | -0.50454300 |
| C | -0.15415700 | -3.10954500 | 1.51022100  |
| H | -1.14052300 | -2.70432900 | 1.76391300  |
| H | -0.25832200 | -3.70602900 | 0.60454600  |
| H | 0.17423900  | -3.77443100 | 2.31738200  |
| H | 6.96156900  | 0.82209800  | 6.49208800  |
| H | 5.15029400  | 3.43455500  | 0.98425500  |
| H | 0.12988100  | 6.04060500  | 3.88413200  |
| H | 2.35154800  | 4.01673800  | 9.48302200  |

**(vi) Fe<sup>III</sup>-N (mono NODMA)  $S = 5/2$**

|    |             |            |            |
|----|-------------|------------|------------|
| Fe | 3.44959700  | 3.27847200 | 5.19487300 |
| N  | 2.05384900  | 4.47729700 | 6.19194900 |
| N  | 2.96400600  | 4.23280400 | 3.40600700 |
| C  | 1.83314600  | 4.50736200 | 7.55473100 |
| C  | 0.66207000  | 5.33202700 | 7.82368600 |
| H  | 0.25762900  | 5.53658300 | 8.80601800 |
| C  | 0.21556600  | 5.77577100 | 6.62716100 |
| H  | -0.63041200 | 6.41916000 | 6.42527600 |
| C  | 1.11246100  | 5.22422000 | 5.61963500 |
| C  | 1.00927100  | 5.47092800 | 4.21803300 |
| C  | 1.85866800  | 5.04041400 | 3.22634900 |
| C  | 1.77554200  | 5.41831900 | 1.82509700 |
| H  | 1.00981300  | 6.05149900 | 1.39686000 |
| C  | 2.84079600  | 4.85815000 | 1.20409600 |

|   |             |             |             |
|---|-------------|-------------|-------------|
| H | 3.12309200  | 4.93565900  | 0.16247600  |
| C | 3.57378300  | 4.12143400  | 2.21826300  |
| C | 4.77010600  | 3.38898100  | 1.98421800  |
| N | 5.18239200  | 2.57826700  | 4.24816600  |
| N | 4.29476100  | 2.83877400  | 7.04358500  |
| C | 5.50900000  | 2.69515300  | 2.91669500  |
| C | 6.75742900  | 1.98972700  | 2.67069000  |
| H | 7.25495300  | 1.91864600  | 1.71248100  |
| C | 7.15696300  | 1.47940900  | 3.86013600  |
| H | 8.04846400  | 0.90552100  | 4.07539900  |
| C | 6.15773100  | 1.87431700  | 4.83768900  |
| C | 6.23478500  | 1.58645400  | 6.23101900  |
| C | 5.40157000  | 2.03336200  | 7.22731700  |
| C | 5.55378500  | 1.76272100  | 8.64892900  |
| H | 6.33986000  | 1.16241600  | 9.08735100  |
| C | 4.54662000  | 2.41161200  | 9.27897900  |
| H | 4.33625400  | 2.44927800  | 10.33948000 |
| C | 3.76933200  | 3.07493800  | 8.24535500  |
| C | 2.60516100  | 3.86925700  | 8.48831000  |
| O | 1.59774500  | 1.41447400  | 6.34817400  |
| N | 2.10078100  | 1.52414800  | 5.23897800  |
| N | 0.75557400  | -2.07375400 | 1.22876200  |
| C | 1.73790000  | 0.60724600  | 4.26803400  |
| C | 2.34773000  | 0.71030100  | 3.00556100  |
| H | 3.08156500  | 1.48867500  | 2.83103200  |
| C | 2.03247000  | -0.16874100 | 1.99838100  |
| H | 2.52321100  | -0.06487000 | 1.03949100  |
| C | 1.07756100  | -1.20233000 | 2.21240200  |
| C | 0.46738800  | -1.29292400 | 3.50088400  |
| H | -0.26427200 | -2.06472400 | 3.70228400  |
| C | 0.79120600  | -0.41322900 | 4.49913800  |
| H | 0.32361200  | -0.48771500 | 5.47463800  |
| C | 1.38393200  | -1.96809000 | -0.07964400 |
| H | 2.47059100  | -2.09518800 | -0.01061700 |
| H | 0.99348900  | -2.75051500 | -0.72917500 |
| H | 1.16840600  | -1.00028400 | -0.54714300 |
| C | -0.22094800 | -3.12846700 | 1.46513600  |
| H | -1.20123500 | -2.71288200 | 1.72453500  |
| H | -0.33512000 | -3.71931500 | 0.55716800  |
| H | 0.10463700  | -3.79996800 | 2.26758000  |
| H | 7.07538900  | 0.97189700  | 6.54017600  |
| H | 5.14785500  | 3.40138400  | 0.96603200  |
| H | 0.18570600  | 6.10789300  | 3.90865800  |
| H | 2.31208200  | 3.97716600  | 9.52839500  |



**References:**

1. S. Wirth and I. P. Lorenz, *Z. Naturforsch. B*, 2012, **B67**, 532-542.
2. B. Knieriem, Ph.D. dissertation, University of Göttingen, 1972.
3. Spectral database for Organic Compounds, SDBS #3054 (NODMA) and #6732 (NODEA). <https://sdb.sdb.aist.go.jp>. Accessed September 28, 2020.
